# Supplementary material for: Fearful dogs have increased plasma glutamine and γ-glutamyl glutamine
Source: PubMed Central journal article supplement (PMC6206014; doi:10.1038/s41598-018-34321-x), 2018-10-29
Supplement: 41598_2018_34321_MOESM1_ESM.pdf [file 41598_2018_34321_MOESM1_ESM.pdf]

## **Fearful dogs have increased plasma glutamine and $\gamma$ -glutamyl glutamine**

Jenni Puurunen, Katriina Tiira, Katariina Vapalahti, Marko Lehtonen, Kati Hanhineva & Hannes Lohi

**Supplementary table S1. Detailed demographics of study participants.** Information includes age, breed, sex, behavioral scores (human fear variable, situation fear variable and fear reaction variable), fasting status and diet of the dog. Dogs numbered from 1 to 20 are fearful dogs (case dogs) whereas dogs numbered from 21 to 41 are non-fearful dogs (control dogs).

|     | Age (years) | Breed           | Sex    | Human fear variable | Situation fear variable | Fear reaction variable | Fasting prior to blood sampling | Diet (Royal Canin Maxi Sensible) |
|-----|-------------|-----------------|--------|---------------------|-------------------------|------------------------|---------------------------------|----------------------------------|
| 1   | 7.3         | German Shepherd | female | 9                   | 1                       | 5                      | yes                             | yes                              |
| 2   | 4.2         | German Shepherd | female | 14                  | 2                       | 8                      | yes                             | yes                              |
| 3   | 3.9         | German Shepherd | female | 21                  | 6                       | 13.5                   | yes                             | yes                              |
| 4   | 7.5         | German Shepherd | female | 21                  | 0                       | 10.5                   | yes                             | yes                              |
| 5   | 2.1         | German Shepherd | female | 12                  | 0                       | 6                      | yes                             | yes                              |
| 6   | 8.2         | German Shepherd | female | 3                   | 6                       | 4.5                    | no                              | yes                              |
| 7   | 8.7         | German Shepherd | male   | 2                   | 6                       | 4                      | yes                             | yes                              |
| 8   | 4.1         | German Shepherd | male   | 15                  | 4                       | 9.5                    | yes                             | yes                              |
| 9   | 2.9         | German Shepherd | male   | 10                  | 9                       | 8                      | no                              | yes                              |
| 10  | 3.8         | Great Dane      | female | 24                  | 0                       | 12                     | yes                             | yes                              |
| 11  | 2.9         | Great Dane      | female | 21                  | 0                       | 10.5                   | yes                             | yes                              |
| 12  | 2.6         | Great Dane      | female | 10                  | 0                       | 5                      | yes                             | yes                              |
| 13  | 5.0         | Great Dane      | female | 16                  | 10                      | 13                     | yes                             | yes                              |
| 14  | 3.4         | Great Dane      | female | 15                  | 12                      | 15.5                   | no                              | yes                              |
| 15  | 1.6         | Great Dane      | female | 6                   | 0                       | 6                      | no                              | yes                              |
| 16  | 1.5         | Great Dane      | female | 24                  | 9                       | 17                     | no                              | yes                              |
| 17* | 7.5         | Great Dane      | male   | 14                  | 12                      | 13                     | yes                             | yes                              |
| 18  | 5.9         | Great Dane      | male   | 16                  | 4                       | 10                     | yes                             | yes                              |
| 19* | 6.7         | Great Dane      | male   | 30                  | 9                       | 19.5                   | no                              | yes                              |
| 20  | 4.5         | Great Dane      | male   | 16                  | 4                       | 10                     | no                              | yes                              |
| 21  | 1.6         | German Shepherd | female | 0                   | 0                       | 0                      | yes                             | yes                              |
| 22  | 8.2         | German Shepherd | female | 0                   | 0                       | 0                      | yes                             | yes                              |
| 23  | 5.6         | German Shepherd | female | 0                   | 0                       | 0                      | yes                             | yes                              |
| 24  | 3.1         | German Shepherd | female | 0                   | 0                       | 0                      | yes                             | yes                              |
| 25  | 8.6         | German Shepherd | female | 0                   | 0                       | 0                      | yes                             | yes                              |
| 26  | 5.4         | German Shepherd | female | 0                   | 0                       | 0                      | no                              | yes                              |
| 27  | 8.2         | German Shepherd | female | 0                   | 0                       | 0                      | no                              | yes                              |
| 28  | 4.5         | German Shepherd | male   | 0                   | 0                       | 0                      | yes                             | yes                              |
| 29  | 3.6         | German Shepherd | male   | 0                   | 0                       | 0                      | no                              | no                               |
| 30  | 2.8         | German Shepherd | male   | 0                   | 0                       | 0                      | no                              | yes                              |
| 31  | 3.2         | Great Dane      | female | 0                   | 0                       | 0                      | yes                             | yes                              |
| 32  | 1.9         | Great Dane      | female | 0                   | 0                       | 0                      | yes                             | yes                              |
| 33  | 4.3         | Great Dane      | female | 0                   | 0                       | 0                      | no                              | yes                              |
| 34  | 3.0         | Great Dane      | female | 0                   | 0                       | 0                      | no                              | yes                              |
| 35  | 4.6         | Great Dane      | female | 0                   | 0                       | 0                      | no                              | yes                              |
| 36  | 2.7         | Great Dane      | female | 0                   | 0                       | 0                      | no                              | yes                              |
| 37  | 4.1         | Great Dane      | female | 0                   | 0                       | 0                      | no                              | yes                              |
| 38  | 4.3         | Great Dane      | male   | 0                   | 0                       | 0                      | yes                             | yes                              |
| 39  | 6.4         | Great Dane      | male   | 0                   | 0                       | 0                      | yes                             | yes                              |
| 40  | 5.4         | Great Dane      | male   | 0                   | 0                       | 0                      | yes                             | yes                              |
| 41* | 5.4         | Great Dane      | male   | 0                   | 0                       | 0                      | no                              | yes                              |

\* Dog was included also in previous metabolomics study cohort of canine fear (Puurunen, J., Tiira, K., Lehtonen, M., Hanhineva, K. & Lohi, H. Non-targeted metabolite profiling reveals changes in oxidative stress, tryptophan and lipid metabolisms in fearful dogs. *Behav. Brain Funct.* **12**, 7 (2016)).

**Supplementary Table S2. Characteristics for the statistically significant metabolites in liquid chromatography-mass spectrometry analysis.** Information includes molecular weight (MW), identified ion (*m/z*), retention time (rt), analytical mode and fragment ions in the tandem mass spectrometry (MS/MS fragmentation). Variable importance on projection (VIP) -values, fold change values and Mann-Whitney U FDR-corrected p-values ( $p_{FDR}$ ) are listed as indicators of statistical significance.

| Putative annotation                   | MW      | <i>m/z</i> | rt   | Mode   | MS/MS fragmentation                               | VIP  | Fold change <sup>a</sup> | $p_{FDR}$ <sup>b</sup> |
|---------------------------------------|---------|------------|------|--------|---------------------------------------------------|------|--------------------------|------------------------|
| SDMA <sup>1</sup>                     | 202.144 | 203.151    | 6.47 | HILIC+ | ESI(+) 203.150, 172.107, 116.072, 70.067          | 2.16 | 1.98                     | 0.032                  |
| Glutamine <sup>2</sup>                | 146.069 | 147.077    | 6.17 | HILIC+ | ESI(+) 147.077, 130.050, 84.045                   | 2.14 | 1.23                     | 0.005                  |
| $\gamma$ -Glu Gln <sup>3</sup>        | 275.113 | 276.119    | 7.37 | HILIC+ | ESI(+) 276.193, 242.065, 147.076, 130.049, 57.069 | 2.02 | 1.46                     | 0.005                  |
| Unknown                               | 106.024 | 105.017    | 0.98 | HILIC- |                                                   | 1.61 | 1.33                     | 0.047                  |
| Unknown                               | 700.402 | 701.410    | 2.97 | HILIC+ |                                                   | 1.57 | 1.23                     | 0.032                  |
| Unknown                               | 134.019 | 133.012    | 0.98 | HILIC- |                                                   | 1.45 | 1.22                     | 0.047                  |
| Unknown                               | 218.058 | 217.051    | 0.97 | HILIC- |                                                   | 1.26 | 1.75                     | 0.035                  |
| Unknown                               | 173.055 | 172.047    | 0.97 | HILIC- |                                                   | 1.20 | 1.47                     | 0.036                  |
| threo-(Homo)2-isocitrate <sup>4</sup> | 220.057 | 219.050    | 0.97 | HILIC- | ESI(-) 219.054, 173.043, 43.000                   | 1.18 | 1.49                     | 0.038                  |
| 2-Oxopimelate <sup>5</sup>            | 174.051 | 173.044    | 0.97 | HILIC- | ESI(-) 173.050, 128.041, 43.000                   | 1.16 | 1.41                     | 0.035                  |
| Unknown                               | 100.016 | 99.009     | 0.99 | HILIC- |                                                   | 1.11 | -1.77                    | 0.036                  |

<sup>a</sup> Average fold change when compared against the control group. Fold changes  $\geq \pm 1.2$  were considered as statistically significant. Positive values indicate increased plasma levels in case dogs vs. control dogs, whereas negative values indicate decreased plasma levels in case dogs vs. control dogs

<sup>b</sup> Benjamini-Hochberg false discovery rate (FDR) corrected Mann Whitney U p-value (Benjamini, Y. & Hochberg, Y. Controlling the False Discovery Rate: A Practical and Powerful Approach to Multiple Testing. *Journal of the Royal Statistical Society. Series B (Methodological)* 57, 289–300 (1995))

SDMA = symmetric dimethylarginine,  $\gamma$ -Glu Gln =  $\gamma$ -glutamylglutamine

Upperscript numbers denote to identification references as follows: <sup>1</sup> MID44873, Saigusa, D. et al. Determination of Asymmetric Dimethylarginine and Symmetric Dimethylarginine in Biological Samples of Mice Using LC/MS/MS. *Am. J. Anal. Chem.* Vol. 2, pp. 303–313 (2011); <sup>2</sup> MID18, HMDB00641; <sup>3</sup> MT000128, Zhang, J. et al. A metabolomics approach for authentication of *Ophiocordyceps sinensis* by liquid chromatography coupled with quadrupole time-of-flight mass spectrometry. *Food Res. Int.* Vol. 76, pp. 489–497 (2015); <sup>4</sup> MID71254, KEGG C16597; <sup>5</sup> MID23, KEGG C16588

**Supplementary Table S3. Human fear and situation fear related questions in the canine behavioral questionnaire, and the scoring of the answers.** Questions concerning fearfulness towards strangers (A), and fearfulness in new situation or environment (B). Human fear variable and situation fear variable were derived from questions A and B, respectively.

| <b>A. Does your dog show shyness or fear when meeting a strange person?</b> | <b>Score</b> |
|-----------------------------------------------------------------------------|--------------|
| <i>Withdraws</i>                                                            | 5            |
| <i>Barks (does not go towards the person)</i>                               | 1            |
| <i>Growls (does not go towards the person)</i>                              | 1            |
| <i>Tail low / between the legs</i>                                          | 1            |
| <i>Not willing to make contact</i>                                          | 1            |
| <i>Stays close to the owner (even when not under a command)</i>             | 1            |
| <i>Barks / growls and goes towards a stranger</i>                           | 1            |
| <b>How often does the dog react fearfully?</b>                              | <b>Score</b> |
| <i>Always, 100% of the times</i>                                            | 4            |
| <i>Almost always, 60-100% of the times</i>                                  | 3            |
| <i>Often, 40-60% of the times</i>                                           | 2            |
| <i>Rarely, 0-40% of the times</i>                                           | 1            |

| <b>B. Does your dog show fear or stress in a new situation or in a new environment?</b> | <b>Score</b> |
|-----------------------------------------------------------------------------------------|--------------|
| <i>Wants out of the situation / new environment</i>                                     | 1            |
| <i>Barks</i>                                                                            | 1            |
| <i>Tail low / between the legs</i>                                                      | 1            |
| <i>Stays still, does not want to explore the new environment</i>                        | 1            |
| <i>Stays close to the owner (even when not under a command)</i>                         | 1            |
| <i>Walks low</i>                                                                        | 1            |
| <i>Pants</i>                                                                            | 1            |
| <i>Trembles</i>                                                                         | 1            |
| <b>How often does the dog react fearfully?</b>                                          | <b>Score</b> |
| <i>Always, 100% of the times</i>                                                        | 4            |
| <i>Almost always, 60-100% of the times</i>                                              | 3            |
| <i>Often, 40-60% of the times</i>                                                       | 2            |
| <i>Rarely, 0-40% of the times</i>                                                       | 1            |
